1 **Title**

2 **A dynamic model of the ABA Signaling pathway with its core components: translation rate**  
3 **of PP2C determines the kinetics of ABA-induced gene expression**

4 **Authors: Ruth Ndathe<sup>1</sup>, Renee Dale<sup>2</sup>, and Naohiro Kato<sup>1\*</sup>**

5 1. Department of Biological Sciences, Louisiana State University, Baton Rouge, United  
6 States

7 2. Donald Danforth Plant Science Center, St. Louis, MO, United States

8 \*Corresponding Author

9 TEL: +1(225) 578-2004 EMAIL: [KATO@LSU.EDU](mailto:KATO@LSU.EDU)

10 **Word counts**

11 Total: 9,375

12 Summary: 192

13 Introduction: 795

14 Description: 636

15 Results: 3,615

16 Discussion: 643

17 **Number**

18 Figures: 7 (color)

19 Tables: 3

20 **Supporting information**

21 Supplemental figures: 2, Supplemental methods, Supplemental files: 2

22  
23  
24  
25  
26

## 27 **Summary**

28 The abscisic acid (ABA) signaling pathway is the key defense mechanism against drought stress  
29 in plants, yet the connectivity of cellular molecules related to gene expression in response to ABA  
30 is little understood. A dynamic model of the core components of the ABA signaling pathway was  
31 built using ordinary differential equations to understand the connectivity. Parameter values of  
32 protein-protein interactions and enzymatic reactions in the model were implemented from the data  
33 obtained by previously conducted experiments. On the other hand, parameter values of gene  
34 expression and translation were determined by comparing the kinetics of gene expression in the  
35 model to those of ABA-induced *RD29A* (response to desiccation 29A) in actual plants. Based on  
36 the analyses of the optimized model, we hypothesized that the translation rate of PP2C (protein  
37 phosphatase type 2C) is downregulated by ABA to increase the ABRE (ABA-responsive element)  
38 promoter activity. The hypotheses were preliminarily supported by newly conducted  
39 experiments using transgenic Arabidopsis plants that carry a luciferase expression cassette driven  
40 by the *RD29A* promoter (*RD29A::LUC*). The model suggests that identifying a mechanism that  
41 alters PP2C translation rate would be one of the next research frontiers in the ABA signaling  
42 pathway.

43

## 44 Introduction

45 Plants possess defense mechanisms against drought (Basu *et al.*, 2016; Kumar *et al.*, 2018;  
46 Takahashi *et al.*, 2020a). One of the major mechanisms is the abscisic acid (ABA) signaling  
47 pathway. ABA is a phytohormone that is produced under the drought stress conditions (Zeevaart  
48 & Creelman, 1988; Sauter *et al.*, 2001; Ikegami *et al.*, 2008). The ABA signaling pathway has  
49 been well-characterized, leading to downstream ABA responses such as stomatal closure and gene  
50 expression that help the plant to acquire drought stress resistance (Steuer *et al.*, 1988; Fujii *et al.*,  
51 2009; Umezawa *et al.*, 2009). The most upstream of the core components in the ABA signaling  
52 pathway is ABA-receptors named pyrabactin resistance/pyr1-like/regulatory components of ABA  
53 receptors (PYR/PYL/RCAR) that bind ABA and in turn interact with different protein phosphatase  
54 2Cs (PP2Cs), namely aba insensitive1/2 (ABI1/ABI2), hypersensitive to aba1/2 (HAB1/HAB2),  
55 aba-hypersensitive germination 3 (AHG3/PP2CA), and highly aba induced 1/2/3 (HA1/2/3).  
56 Without the PYR interaction, these PP2Cs inhibit SNF1-related protein kinase 2s (SnRK2s) that  
57 include SnRK2.2, SnRK2.3 and SnRK2.6. (Rodriguez *et al.*, 1998; Gosti *et al.*, 1999; Merlot *et*  
58 *al.*, 2001; Saez *et al.*, 2004; Ma *et al.*, 2009; Melcher *et al.*, 2009; Nishimura *et al.*, 2009; Park *et*  
59 *al.*, 2009; Santiago *et al.*, 2009; Yin *et al.*, 2009; Soon *et al.*, 2012). Activated SnRK2s  
60 phosphorylate ABA-responsive elements (ABRE) binding factors 1/2/3/4 (ABF1/2/3/4). These  
61 phosphorylated transcription factors bind ABREs on a regulatory region of ABA-induced genes  
62 (Choi *et al.*, 2000; Uno *et al.*, 2000; Yoshida *et al.*, 2015). Alternatively, the activated SnRK2,  
63 namely SnRK2.6 kinase, phosphorylate the slow-anion channels (SLAC1) leading to their  
64 activation and subsequently lead to stomatal closure due to anion and K<sup>+</sup> efflux and eventual solute  
65 loss from the guard cells (Schroeder *et al.*, 1984; Geiger *et al.*, 2009; Lee *et al.*, 2009; Albert *et*  
66 *al.*, 2017).

67 The ABA signaling pathway has been mathematically modeled to help understand the  
68 ABA signaling pathway in guard cells leading to stomatal closure (Li *et al.*, 2006; Albert *et al.*,  
69 2017; Maheshwari *et al.*, 2019; Maheshwari *et al.*, 2020). These works have led to the  
70 determination of new predictions and hypotheses in the ABA signaling pathway, for example, the  
71 role of feedback regulation, ROS, Ca<sup>2+</sup>, pH, and heterotrimeric G-protein signaling in ABA-  
72 induced stomatal closure (Li *et al.*, 2006; Albert *et al.*, 2017; Maheshwari *et al.*, 2019). In addition,

73 the additive effect of ABA and salt stress on ABA and drought-responsive expression of genes  
74 was also explained using mathematical modeling (Lee *et al.*, 2016).

75 The ABA signaling pathway has additional regulatory mechanisms, which are feedback  
76 and post-translational regulations. The feedback regulation involves upregulation of PP2C genes,  
77 which eventually results in enhanced deactivation of SnRK2s (Rodriguez *et al.*, 1998; Saez *et al.*,  
78 2004; Fujita *et al.*, 2009; Wang *et al.*, 2019). It also includes the upregulation of ABF genes, which  
79 increases ABF expression (Wang *et al.*, 2019). These regulatory elements are thought to affect  
80 gene expression kinetics. The post-translation regulation involves phosphorylation of PYL by the  
81 target of rapamycin (TOR) protein kinase (Wang *et al.*, 2018). On the other hand, Raptor, the TOR  
82 associated protein, is phosphorylated by SnRK2s, leading to TOR kinase inhibition (Wang *et al.*,  
83 2018). In another study, TOR was found to suppress ABA-responses by phosphorylating  
84 *Arabidopsis thaliana* yet another kinase (AtYAK1) (Forzani *et al.*, 2019) that is a positive  
85 regulator of ABA-mediated signal responses (Kim *et al.*, 2016). Therefore, TOR was proposed to  
86 be a post-translation regulator in the ABA signaling pathway. E3-ligases are another post-  
87 translational regulator which promotes the degradation of ABA signaling components, including  
88 PP2CA (Wu *et al.*, 2016), SnRK2.6 (Ali *et al.*, 2019), and PYL5/7/8/9 (Zhao *et al.*, 2017).

89 Network connectivity of these additional regulatory mechanisms to the core components  
90 is little understood. Dynamic modelling can allow us to better understand their role in the ABA  
91 signaling pathway. Dynamic modelling is a powerful tool that integrates extensive experimental  
92 data of pathway components, improving our understanding of the signaling pathway dynamics and  
93 making novel hypotheses and predictions (Poolman *et al.*, 2004; Aldridge *et al.*, 2006; Janes &  
94 Yaffe, 2006; Thakar *et al.*, 2007). *In vitro* parameters for many of the interactions of the core  
95 components in the ABA signaling pathway have been experimentally determined, allowing us to  
96 create a dynamic model.

97 The purpose of this study is to build a dynamic model consisting of the core components  
98 with fixed parameter values that were previously obtained by experiments. Approximate curve  
99 fitting of the model output to actual plant data was conducted by optimizing parameter values of  
100 transcription and translation, which were not determined previously. In this report, we describe  
101 how we built, optimized, and validated the model. The resulting model suggested two novel

102 hypotheses, which were supported by preliminary experiments. This model can be expanded to  
103 investigate the roles of additional regulatory mechanisms in future studies.

104

## 105 **Description**

### 106 **Construction of the dynamic model**

107 A previous study defined a minimal set of core components that activate the ABFs, leading  
108 to ABA-induced gene expression in the ABA signaling pathway (Fujii *et al.*, 2009). The  
109 components are ABA, PYR/PYL/RCAR, PP2Cs (ABI1/2 and HAB1/2), SnRK2s (SnRK2.2/3/6),  
110 ABFs (ABF2/3/4), and ABRE. Other studies have determined that the PP2CA phosphatases  
111 dephosphorylate phosphorylated ABFs (Antoni *et al.*, 2012; Lynch *et al.*, 2012). In addition,  
112 another study identified MAP3K phosphorylates SnRK2s (Takahashi *et al.*, 2020b). These two  
113 reactions were included in the model. We also included the feedback regulation in which the  
114 expression of PP2C, PP2CA, and ABF genes are upregulated by the ABRE promoter activity  
115 (Wang *et al.*, 2019). A set of 21 ordinary differential equations representing biochemical reactions  
116 of each component were constructed based on the law of mass action (Fig. 1). Homologous  
117 proteins with redundant function are modeled as a single protein. Initial values of variables and  
118 values of parameters in the equations were obtained from the literature (Table 1). The equations,  
119 initial conditions (concentrations), and parameter values were then compiled and numerically  
120 analyzed with MATLAB R2020b SimBiology (MathWorks) with default settings.

121

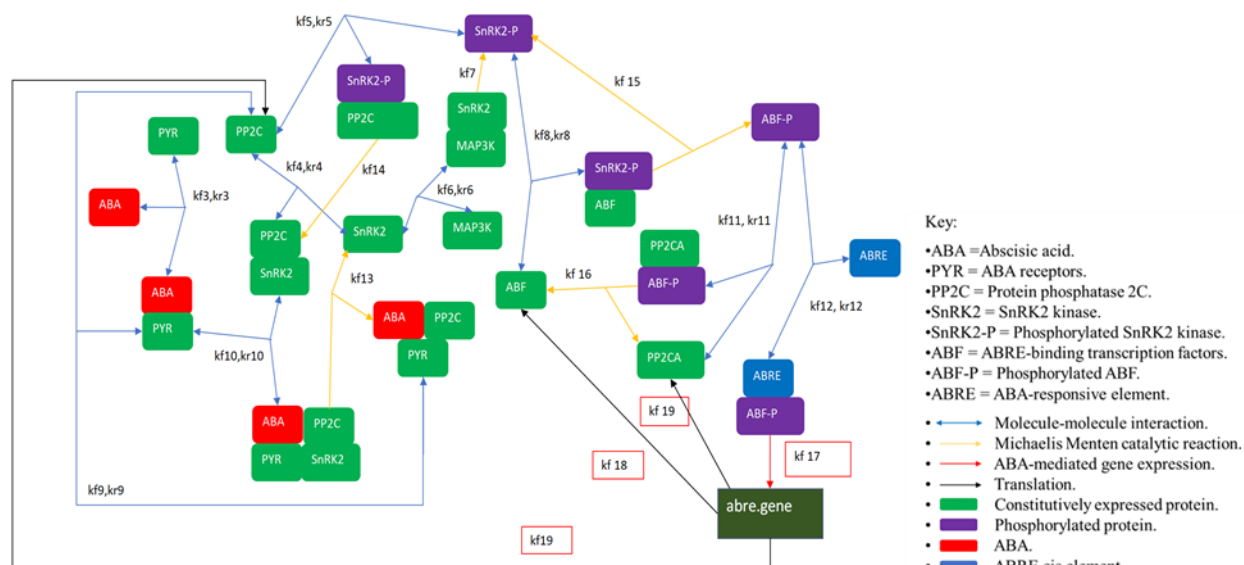

122

123 **Figure 1. A schematic mass-action model of the ABA-signaling pathway with its core components.** Rectangles  
 124 and arrows represent variables and reactions, respectively. Identifiers of parameters in each reaction are shown as kf  
 125 or kr with unique number. Parameters optimized in this study are indicated with a red frame. The values of each  
 126 parameter are shown in Table 1.

127 In the model, we assumed:

- 128 • ABA signal transduction occurs through molecule-molecular interactions; where the  
 129 molecule could be a protein, a hormone, or DNA.
- 130 • Enzymatic reactions follow Michaelis-Menten kinetics.
- 131 • All molecules freely diffuse in the cell.
- 132 • The cell volume is  $50 \mu\text{m}^3$ .
- 133 • The Michaelis constant is  $K_M = \frac{k_{off} + k_{cat}}{k_{on}}$ , where  $k_{off}$  is the dissociation rate constant,  $k_{cat}$   
 134 is the catalytic rate constant, and  $k_{on}$  is the association rate constant.
- 135 • A molecule associates with another molecule at a rate constant of,  $k_{on} = 1000 \mu\text{M}^{-1}\text{s}^{-1}$  (Milo  
 136 & Phillips, 2015).
- 137 • Proteins are generated by reactions of gene expression and protein translation, then subject  
 138 to degradation.
- 139 • The concentration of a protein in a cell remains at  $0.1 \mu\text{M}$  at a steady state without ABA  
 140 activation and feedback regulation.

- 141       • A gene (mRNA) is expressed from a pair of gene loci that have a constitutively active  
142 promoter, then subjected to degradation.
- 143       • A gene (mRNA) that is expressed by a feedback regulation has an additional regulatory  
144 element (ABRE) in the same gene loci that have a constitutively active promoter.

145       In numerical analysis, the model was first run for 300 equivalent hours with the variable ABA  
146 (representing intracellular ABA) set at 0  $\mu$ M. This allows the system to reach a quasi-steady state.  
147 After the 300 equivalent hours, the variable ABA was set to 100  $\mu$ M. Changes of all variables in  
148 the model from the quasi-steady state was then monitored for another 300 equivalent hours. In this  
149 report, the time point when the variable ABA is changed is presented as time zero.

## 150 **Optimization of parameters, validation of the model, and analyzing identifiability of model** 151 **parameters**

152       To optimize selected model parameters, we approximately curve fit model output to  
153 experimental data. We focused on changes in the variable `abre.gene`, representing accumulated  
154 mRNA expressed from the ABRE promoter. Three parameters, 1. transcription of ABA-induced  
155 genes, 2. translation of feed-backed ABF, 3. translation of feed-backed PP2C and PP2CA, were  
156 manually changed to obtain qualitatively good fits to experimental data. The remaining model  
157 parameters were unchanged (fixed). To validate the model, we quantitatively evaluated changes  
158 of the variable `abre.gene`. Fold changes calculated by the model were compared to data previously  
159 published or data newly obtained in this study. To analyze identifiability on the dynamics of the  
160 variable `abre.gene`, we conducted sensitivity analysis using Calculate Sensitivity in Model  
161 Analyzer in SimBiology with default settings.

162

## 163 **Results**

### 164 **Parameter values were obtained by literature curation**

165       We curated previously published data to define parameters in the model of the ABA  
166 signaling pathway that activates the ABF, resulting in the activation of the gene promoter  
167 containing ABRE cis element. The summary of our curation is shown below (Table 1).

168 **Table 1. Curated values from literature and the values chosen as parameters for the model.** Each reaction in the  
169 model was shown with the respective parameter and the source from which the value was obtained.

| Description.                                      | Reference.                      | Value found in the literature.                                | Parameter name in the model. | Value used in the model.                                       | Fixed in the model*. |
|---------------------------------------------------|---------------------------------|---------------------------------------------------------------|------------------------------|----------------------------------------------------------------|----------------------|
| Transcription of constitutively expressed genes   | (Hausser <i>et al.</i> , 2019)  | < translation rate                                            | kf1                          | 1 hr <sup>-1</sup>                                             | ✓                    |
| Translation of constitutively expressed genes     | (Hausser <i>et al.</i> , 2019)  | < 10,000 hr <sup>-1</sup>                                     | kf2                          | 4.5 hr <sup>-1</sup>                                           | ✓                    |
| ABA and PYR binding                               | (Dupeux <i>et al.</i> , 2011)   | $K_D = 65 \mu\text{M}$                                        | kf3<br>kr3                   | $1000 \mu\text{M}^{-1} \text{s}^{-1}$<br>$65000 \text{s}^{-1}$ | ✓                    |
| PP2C and SnRK2 binding                            | (Soon <i>et al.</i> , 2012)     | $\text{IC}_{50}$<br>$2 \mu\text{M} - 8 \mu\text{M}$           | kf4<br>kr4                   | $1000 \mu\text{M}^{-1} \text{s}^{-1}$<br>$0.1 \text{s}^{-1}$   | ✓                    |
| PP2C and SnRK2-P binding                          | (Xie <i>et al.</i> , 2012)      | $K_M = 0.097 \mu\text{M}$                                     | kf5<br>kr5                   | $1000 \mu\text{M}^{-1} \text{s}^{-1}$<br>$97 \text{s}^{-1}$    | ✓                    |
| SnRK2 and MAP3K binding                           | (Ghose, 2019)                   | $K_M = 23 \mu\text{M}$                                        | kf6<br>kr6                   | $1000 \mu\text{M}^{-1} \text{s}^{-1}$<br>$23000 \text{s}^{-1}$ | ✓                    |
| Phosphorylation of SnRK2 by MAP3K                 | (Ghose, 2019)                   | $k_{cat} = 14 \text{s}^{-1}$                                  | kf7                          | $14 \text{s}^{-1}$                                             | ✓                    |
| SnRk2-P and ABF binding                           | (Xie <i>et al.</i> , 2012)      | $K_M = 19.3 \mu\text{M}$                                      | kf8<br>kr8                   | $1000 \mu\text{M}^{-1} \text{s}^{-1}$<br>$19300 \text{s}^{-1}$ | ✓                    |
| PYR.ABA and PP2C binding                          | (Dupeux <i>et al.</i> , 2011)   | $K_D = 30 \text{nM}$                                          | kf9<br>kr9                   | $1000 \mu\text{M}^{-1} \text{s}^{-1}$<br>$30 \text{s}^{-1}$    | ✓                    |
| PYR.ABA and PP2C.SnRK2 binding                    | (Dupeux <i>et al.</i> , 2011)   | $K_D = 30 \text{nM}$                                          | kf10<br>kr10                 | $1000 \mu\text{M}^{-1} \text{s}^{-1}$<br>$30 \text{s}^{-1}$    | ✓                    |
| ABF-P and PP2CA binding                           | (Pan <i>et al.</i> , 2015)      | $K_M = 11.15 \mu\text{M}$                                     | kf11<br>kr11                 | $1000 \mu\text{M}^{-1} \text{s}^{-1}$<br>$11150 \text{s}^{-1}$ | ✓                    |
| ABF-P and ABRE binding                            | (Geertz <i>et al.</i> , 2012)   | $K_D$ of DNA-protein binding<br>$2 \text{nM} - 2 \mu\text{M}$ | kf12<br>kr12                 | $1000 \mu\text{M}^{-1} \text{s}^{-1}$<br>$2 \text{s}^{-1}$     | ✓                    |
| Release of SnRK2 from ABA.PYR.PP2C.SnRK2 complex. | (Bar-Even <i>et al.</i> , 2011) | Average $k_{cat}$ of enzyme reaction<br>$10 \text{s}^{-1}$    | kf13                         | $10 \text{s}^{-1}$                                             | ✓                    |
| Dephosphorylation of SnRK2-P                      | (Xie <i>et al.</i> , 2012)      | $k_{cat} = 0.924 \text{s}^{-1}$                               | kf14                         | $0.924 \text{s}^{-1}$                                          | ✓                    |
| Phosphorylation of ABF by SnRK2-P                 | (Xie <i>et al.</i> , 2012)      | $k_{cat} = 0.04 \text{s}^{-1}$                                | kf15                         | $0.04 \text{s}^{-1}$                                           | ✓                    |
| Dephosphorylation of ABF-P by PP2CA               | (Pan <i>et al.</i> , 2015)      | $k_{cat} = 1.04 \text{s}^{-1}$                                | kf16                         | $1.04 \text{s}^{-1}$                                           | ✓                    |
| Transcription of ABA induced genes                | (Hausser <i>et al.</i> , 2019)  | < translation rate                                            | kf17                         | 10 hr <sup>-1</sup>                                            |                      |
| Translation of feed-backed ABF                    | (Hausser <i>et al.</i> , 2019)  | < 10,000 hr <sup>-1</sup>                                     | kf18                         | 200 hr <sup>-1</sup>                                           |                      |
| Translation of feed-backed PP2C and PP2CA         | (Hausser <i>et al.</i> , 2019)  | < 10,000 hr <sup>-1</sup>                                     | Kf19                         | 200 hr <sup>-1</sup>                                           |                      |
| Degradation of mRNA                               | (Hausser <i>et al.</i> , 2019)  | mRNA degradation in HEK293 cells<br>$0.06 \text{hr}^{-1}$     | kf20, kf21                   | $0.06 \text{hr}^{-1}$                                          | ✓                    |



|                        |                                |                                                           |              |                       |   |
|------------------------|--------------------------------|-----------------------------------------------------------|--------------|-----------------------|---|
| Degradation of protein | (Hausser <i>et al.</i> , 2019) | Protein decay rate in HeLa cells<br>0.05 hr <sup>-1</sup> | kf22 to kf38 | 0.05 hr <sup>-1</sup> | ✓ |
|------------------------|--------------------------------|-----------------------------------------------------------|--------------|-----------------------|---|

170 \*Fixed in the model: ✓ indicates the value used in the model was not altered during model optimization

171 While parameter values for protein-protein interactions and enzymatic reactions were  
172 characterized in *in vitro* studies using recombinant proteins, no studies related to parameter  
173 values of DNA-protein binding, gene expression, protein translation and degradation were found  
174 for the ABA signaling pathway. To this end, we implemented parameter values from studies  
175 using non-plant eukaryotic organisms. These parameters have a wide range to select from: 1.  
176 equilibrium dissociation constant between ABF-P (phosphorylated ABF) and the ABRE  
177 promoter (from 2 nM to 2 μM) (Geertz *et al.*, 2012), 2. translation rate of protein from mRNA  
178 expressed by the ABRE promoter (less than 10,000 hr<sup>-1</sup>) (Hausser *et al.*, 2019), 3. transcription  
179 rate of the ABRE promoter (slower than the translation rate) (Hausser *et al.*, 2019). We selected  
180 the values of translation and transcription rates for genes at 4.5 hr<sup>-1</sup> and 1 hr<sup>-1</sup>, respectively, and  
181 2nM for (ABF-P)-(ABRE) binding. This is because an average rate of gene transcription in  
182 multicellular eukaryotes is 1 hr<sup>-1</sup> (Hausser *et al.*, 2019) while an average concentration of  
183 proteins involved in a signal transduction is 0.1 μM (Milo & Phillips, 2015). Setting translation  
184 rate at 4.5 hr<sup>-1</sup> and transcription rate at 1 hr<sup>-1</sup> makes the concentration of a protein at quasi-steady  
185 state to 0.1 μM without ABA and feedback regulation in our model. The affinity of (ABF-P)-  
186 (ABRE) binding was set at 2 nM to curve-fit kinetics of the variable *abre.gene* with actual gene  
187 expression (Fig. 2). Protein degradation was set at 0.05 hr<sup>-1</sup> (Hausser *et al.*, 2019). Equilibrium  
188 dissociation constant between SnRK2 (non-phosphorylated SnRK2) and PP2C was set at 100  
189 pM, representing complete inhibition of SnRK2 kinase activity by PP2C at an equal molar  
190 concentration (Soon *et al.*, 2012).

191 **The transcription rate of genes expressed by the ABRE promoter and the translation rate of**  
192 **feedback loop components ABF, PP2C, and PP2CA were optimized in the model to capture**  
193 **observed dynamics in experimental data**

194 To understand the connectivity of the components, we compared the kinetics of gene  
195 expression in the model and experimental data in actual plants. Namely, we compared the  
196 simulation data of the variable *abre.gene*, which represents the accumulation of genes expressed  
197 by the ABRE promoter, to four independent data sets that were experimentally obtained using  
198 actual plants. One set of data was obtained by our new experiments using transgenic *Arabidopsis*

199 *thaliana*. The transgenic plants carry the *RD29A::LUC* gene expression cassette that has been used  
 200 to study the activity of the ABRE promoter (Zhan *et al.*, 2012). The activity of ABRE promoter  
 201 can be monitored by luminescence in near real-time in plants. The other three sets were obtained  
 202 from previously published data that show a change in *RD29A* gene expressed from the native  
 203 ABRE promoter in the genome of either *Arabidopsis thaliana* (Lee *et al.*, 2016; Song *et al.*, 2016)  
 204 or *Oryza sativa* (rice) (Singh *et al.*, 2015). Kinetics of the gene expression in the plants and the  
 205 variable *abre.gene* were compared within the first 24 hours (Fig. 2).

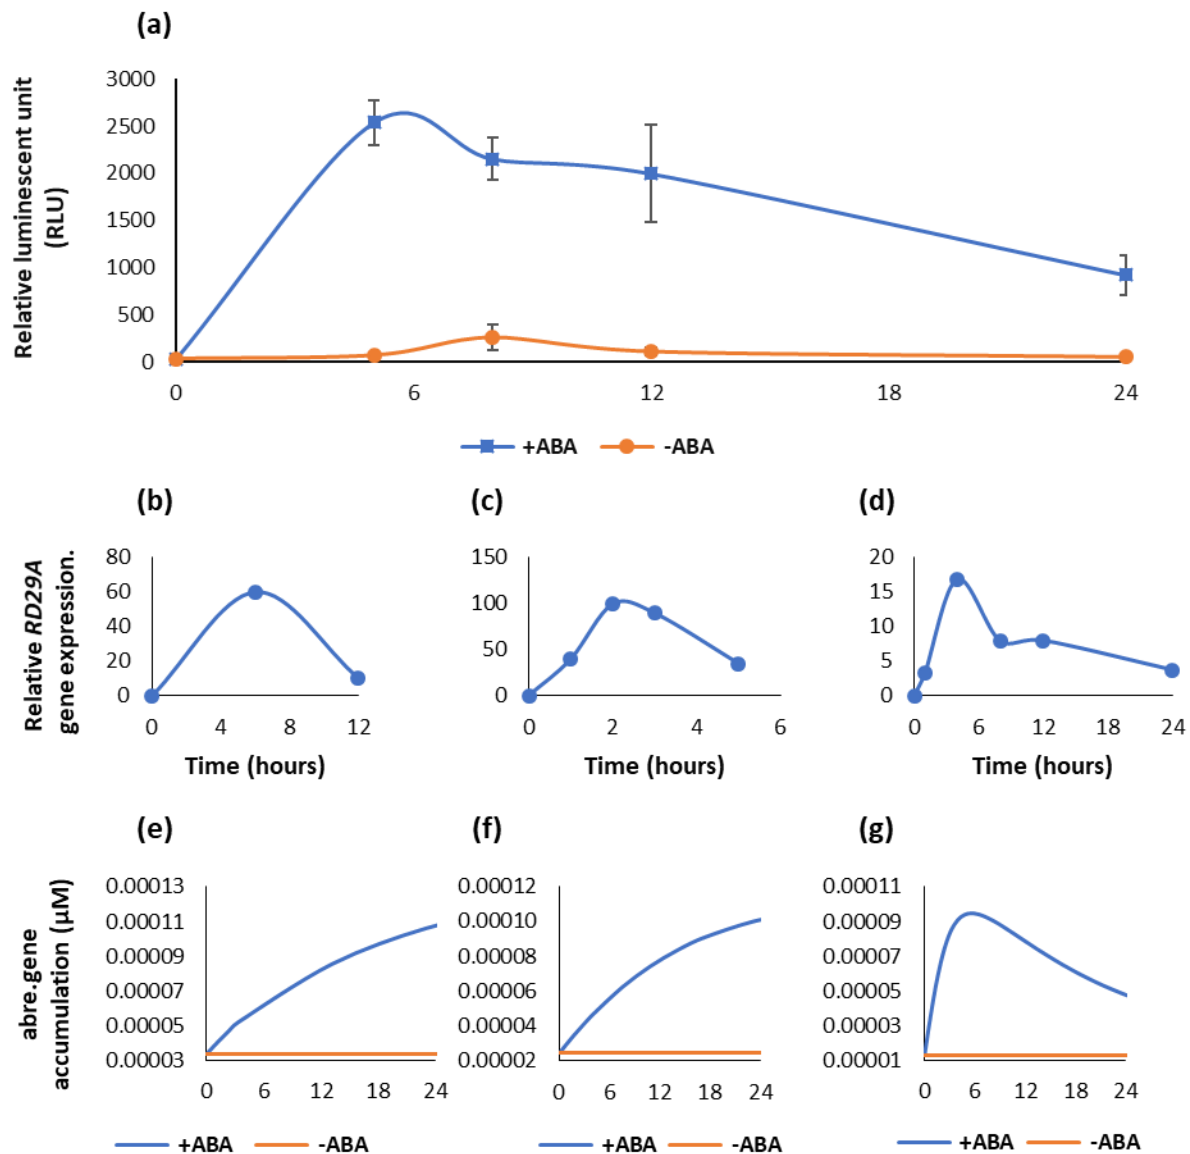

206

207 **Figure 2. Dynamic model agrees with ABA-induced gene expression in real plants after optimization. (a)**

208 Kinetics of luciferase activity in the *RD29A::LUC* plant after exposing to 200 $\mu\text{M}$  ABA (+ABA) or DMSO for control

209 (-ABA). The graph shows a mean of three independent experiments. Error bars represent standard error from the  
210 mean. (b) Kinetics of *RD29A* gene accumulation in the previously published data with 50  $\mu\text{M}$  ABA in rice (Singh *et*  
211 *al.*, 2015). (c) Kinetics of *RD29A* gene accumulation in the previously published data with 100  $\mu\text{M}$  ABA in  
212 Arabidopsis (Lee *et al.*, 2016). (d) Kinetics of *RD29A* gene accumulation in the previously published data with 10  $\mu\text{M}$   
213 ABA in Arabidopsis (Song *et al.*, 2016). (e) Model output without feedback regulation ( $k_{f17} = 1 \text{ hr}^{-1}$ ). (f) Model  
214 output with feedback regulation (adding reactions  $k_{f18} = 4.5 \text{ hr}^{-1}$  and  $k_{f19} = 4.5 \text{ hr}^{-1}$ ). (g) Model output with feedback  
215 regulation and optimized parameters ( $k_{f17} = 10 \text{ hr}^{-1}$ ,  $k_{f18} = 200 \text{ hr}^{-1}$ ,  $k_{f19} = 200 \text{ hr}^{-1}$ ).

216 Experimental data from the transgenic *RD29A::LUC* plants showed transient activation of  
217 the ABRE promoter with an initial increase and then a decrease after 5 hours (Fig. 2a). Similar  
218 transient expression of the *RD29A* gene were observed in non-transgenic plants, Arabidopsis and  
219 rice (Fig. 2b, c, d) (Singh *et al.*, 2015; Lee *et al.*, 2016; Song *et al.*, 2016). When we simulated  
220 kinetics of the variable *abre.gene* in the model without the feedback regulation on ABF, PP2C,  
221 and PP2CA (parameters  $k_{f18}$  and  $k_{f19}$ ), the kinetics were logarithmic upon adding ABA (Fig.  
222 2e). Addition of the feedback regulation had minor impact on the kinetics (Fig. 2f). We then  
223 optimized the parameters so that kinetics of the gene expression in the model qualitatively agree  
224 with that in actual plants (Fig. 2g). We namely altered the three parameters, the transcription rate  
225 constant of the ABRE promoter (parameter  $k_{f17}$ ) and the translation rate constants of ABF and  
226 PP2Cs (parameter  $k_{f18}$  and  $k_{f19}$ , respectively) (Fig. 1 & Table 1). These three parameters had not  
227 been determined previously, and studies in other eukaryotic cells indicate wide ranges of  
228 reasonable values (Table 1). Hence, we selected the values within the ranges that made the kinetics  
229 of the variable *abre.gene* best fit to the actual plant data. The values  $k_{f17} = 10 \text{ hr}^{-1}$ ,  $k_{f18} = 200 \text{ hr}^{-1}$ ,  
230 and  $k_{f19} = 200 \text{ hr}^{-1}$  fitted the kinetic curve with the actual plant reasonably (Fig. 2a, g).

### 231 **Approximation of the model was validated by determining model responses to different doses** 232 **of ABA or a set of gene null-mutations**

233 To validate the model, we first compared the ABA-dose-dependent response in actual  
234 plants to the dynamics of the variable *abre.gene* (Fig. 3). In the model, changes of the variable  
235 *abre.gene* increased in an ABA-dose dependent manner in the range from 0 to 200  $\mu\text{M}$  (Fig. 3a).  
236 With the *RD29A::LUC* transgenic plants, changes of luminescence increased in an ABA-dose  
237 dependent manner in the range from 0 to 200  $\mu\text{M}$  (Fig. 3b). This suggested that the model is  
238 approximated to actual plants with respect to ABA sensitivity although the response in the model  
239 seems to have narrower sensitivity against the ABA concentration (i.e., from 0 to 50  $\mu\text{M}$ )

240 compared to that in the actual plants (i.e., from 0 to 200  $\mu\text{M}$ ) (Fig. 3b) (Gampala *et al.*, 2001; Lee  
241 *et al.*, 2016).

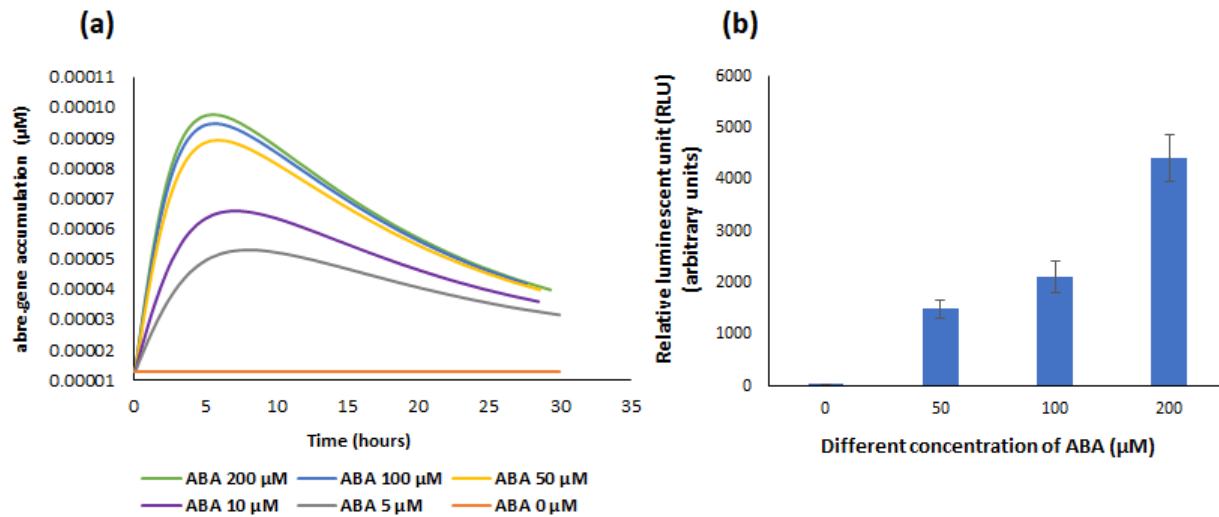

242

243 **Figure 3. ABRE-promoter activity increases with a function of ABA concentration in the model as it is observed**  
244 **in actual plants.** (a) Model output of the variable abre.gene with different values of the variable ABA. (b) Relative  
245 luminescence unit in 25-day-old *RD29A::LUC* plants was determined at 5 hours after spraying different concentrations  
246 of ABA. The bars represent the mean relative luminescence of three replicates with error bars representing standard  
247 error from the mean (15 seedlings).

248 We also validated changes of the variable abre.gene in gene-knockout simulations.  
249 Namely, we simulated expression of a gene from the ABRE promoter in gene null-mutations of  
250 *pyr*, *pp2c*, *snrk2*, and *abf*, which were previously studied (Fujita *et al.*, 2009; Rubio *et al.*, 2009;  
251 Nishimura *et al.*, 2010; Yoshida *et al.*, 2015). We simulated knockout mutations by setting the  
252 translation rate constant (kf2) to zero for the variable PYR, PP2C, SnRK2, and ABF. In addition,  
253 we also set the translation rates of the feedback regulations kf18 and kf19 to zero for ABF and  
254 PP2Cs, respectively. The mimicked null-mutant in *pyr*, *snrk2*, and *abf*, all showed reduced levels  
255 of the variable abre.gene while the mimicked null-mutant in *pp2c* showed elevated levels (Table  
256 2).

257 **Table 2. Mutant simulations show similar output to actual mutated plants with respect to the ABRE promoter**  
258 **activity.** Mutant simulations were made on the model with the variable ABA set at 100  $\mu\text{M}$ . Highest concentration of  
259 the variable abre.gene at each of the simulation was recorded. Relative expression of the *RD29A* gene in actual plants  
260 was curated from previously published literatures.

261

| Variable set to 0 in the model | Highest abre.gene concentration in the model ( $\mu\text{M}$ ) | Knockout genes in actual plants     | <i>RD29A</i> gene expression in the knockout plants exposed to ABA | Reference                      |
|--------------------------------|----------------------------------------------------------------|-------------------------------------|--------------------------------------------------------------------|--------------------------------|
| None                           | 0.000089                                                       | None (wild type)                    | transient                                                          | (Song <i>et al.</i> , 2016)    |
| PPC2                           | 0.011166                                                       | <i>pp2ca/hai1</i>                   | constitutive and high                                              | (Antoni <i>et al.</i> , 2012)  |
| PYR                            | 0.000008                                                       | <i>pyr1/pyl1/pyl2/pyl4</i>          | impaired                                                           | (Park <i>et al.</i> , 2009)    |
| SnRK2                          | 0.000000                                                       | <i>snrk2.2/ snrk2.3<br/>snrk2.6</i> | impaired                                                           | (Thalman <i>et al.</i> , 2016) |
| ABF                            | 0.000000                                                       | <i>areb1/areb2/abf3</i>             | impaired                                                           | (Thalman <i>et al.</i> , 2016) |

262

263 Experimental data in actual plants shows that *pyr* null-mutants are impaired in ABA-  
264 induced gene expression (Park *et al.*, 2009; Nishimura *et al.*, 2010; Gonzalez-Guzman *et al.*, 2012).  
265 Similarly, experimental data on *snrk2.2/ snrk2.3/ snrk2.6* triple knockout mutants showed that the  
266 expression of ABA-induced genes was impaired (Fujii & Zhu, 2009; Fujita *et al.*, 2009; Thalman  
267 *et al.*, 2016). Triple *areb/abf* mutants were found to have reduced ABA-induced gene expression  
268 (Yoshida *et al.*, 2015; Thalman *et al.*, 2016). On the other hand, null-mutants of *pp2cs* in actual  
269 plants show a higher and constitutive ABA response (Rubio *et al.*, 2009; Antoni *et al.*, 2012).  
270 Based on the two validations described above, we concluded that the model constructed, and  
271 parameters implemented in the model are approximated to actual plants.

272 **Model simulation and actual plants agree with respect to the activity of ABRE promoter in**  
273 **a condition where PP2C phosphatase activity is inhibited**

274 With the validated model, we examined a relationship between the phosphatase activity of  
275 PP2C and the activity of the ABRE promoter, which was not examined before. First, we simulated  
276 expression kinetics of the ABA induced gene in which the phosphatase activity of PP2C was  
277 decreased. Namely, we decreased the catalytic rate constant of PP2C (kf14). We changed the value  
278 from the original  $0.924 \text{ s}^{-1}$  (Xie *et al.*, 2012) to  $10^{-5} \text{ s}^{-1}$ , progressively, and tracked changes of the  
279 variable abre.gene for the first 24 hours after changing the variable ABA from 0 to  $100 \mu\text{M}$  (Fig.  
280 **4a**).

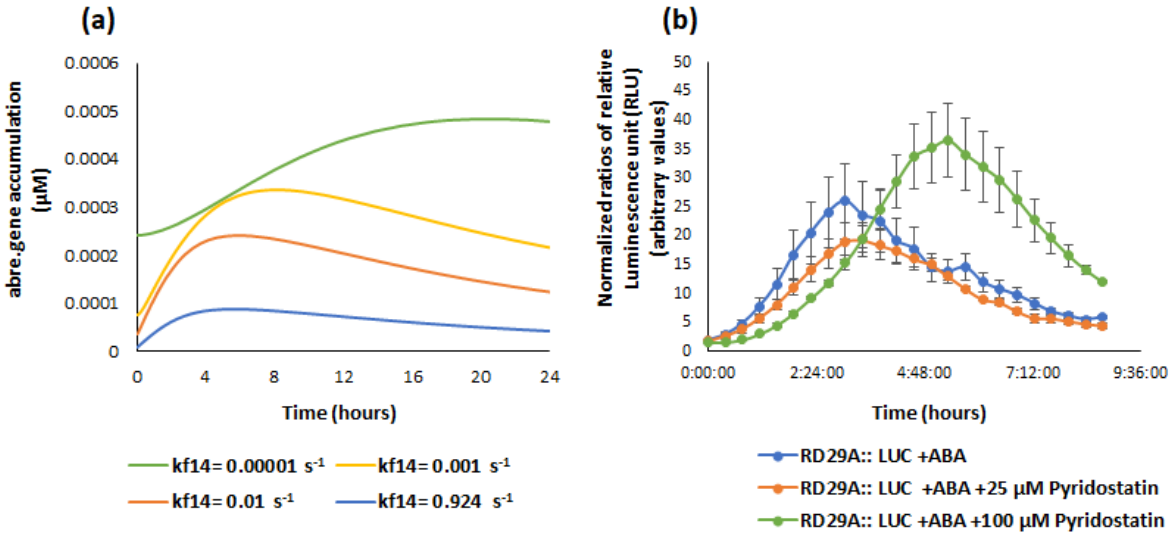

281 **kf14: catalytic rate constant of PP2C.**

282 **Figure 4. Model simulation and actual plants agree with respect to the activity of ABRE promoter in a condition**  
283 **where PP2C phosphatase activity is inhibited. (a)** Model simulation for changes in the variable abre.gene. The  
284 parameter in catalytic rate constant of PP2C (kf14) is progressively reduced from  $0.924 \text{ s}^{-1}$  to  $10^{-5} \text{ s}^{-1}$ . Notice the levels  
285 of the variable abre.gene increased as the parameter value was reduced. At the same time, the time when the variable  
286 abre.gene reached the maximum, was delayed. **(b)** Changes of luminescence in the *RD29A::LUC* transgenic plants.  
287 The plants were exposed to pyridostatin, an inhibitor of PP2C phosphatase. The *RD29A::LUC* plants were treated  
288 with 100 μM ABA, 100 μM ABA + 25 μM pyridostatin, or 100 μM ABA + 100 μM pyridostatin. Luminescence  
289 values were normalized against control (DMSO + 25 μM or 100 μM pyridostatin). Data shown is means of three  
290 independent replicates with error bars derived from standard error from the mean. Notice the levels of normalized  
291 luminescence intensity was increased and the peak time point was delayed on addition of 100 μM pyridostatin.

292 On reduction of catalytic rate constant, the variable abre.gene increases, and the peak time  
293 point is delayed (Fig. 4a). Based on the prediction, we hypothesized that inhibition of the PP2C  
294 phosphatase activity would increase expression of the ABA induced gene and delay its peak time.  
295 To examine the hypothesis, we conducted an experiment with the *RD29A::LUC* transgenic plants  
296 and pyridostatin hydrochloride, a recently identified chemical inhibitor that is specific for the  
297 PP2C phosphatase activity against SnRK2 (Janicki *et al.*, 2020). On addition of 100 μM but not  
298 25 μM pyridostatin hydrochloride, an increase in luminescence as well as a delay of the peak  
299 time was observed, indicating inhibitor-concentration dependent changes (Fig. 4b). We also  
300 examined the *CAMV35S::LUC* transgenic plants in which a constitutive promoter from a  
301 Cauliflower Mosaic Virus drives the expression luciferase (Rosin *et al.*, 2008). We observed no  
302 significant difference between the plants, in which pyridostatin hydrochloride was added or not

303 added, in peak time and luminescence (Fig. **S1**). This confirmed that the change in luminescence  
304 kinetics was not due to the alteration of luciferase enzymatic activity, but due to the differential  
305 activity of the ABRE promoter. Based on these model predictions and biological experiments, we  
306 concluded that inhibition of the PP2C phosphatase activity would increase the ABRE promoter  
307 activity and delay its peak time.

308

### 309 **A new hypothesis: ABA downregulates a translation rate of PP2C to increase the ABRE** 310 **prompter activity**

311 To understand important parameters in the ABA signaling pathway with respect to the  
312 ABRE promoter activity, we conducted a sensitive analysis of key parameters against the  
313 variable `abre.gene` in the model.

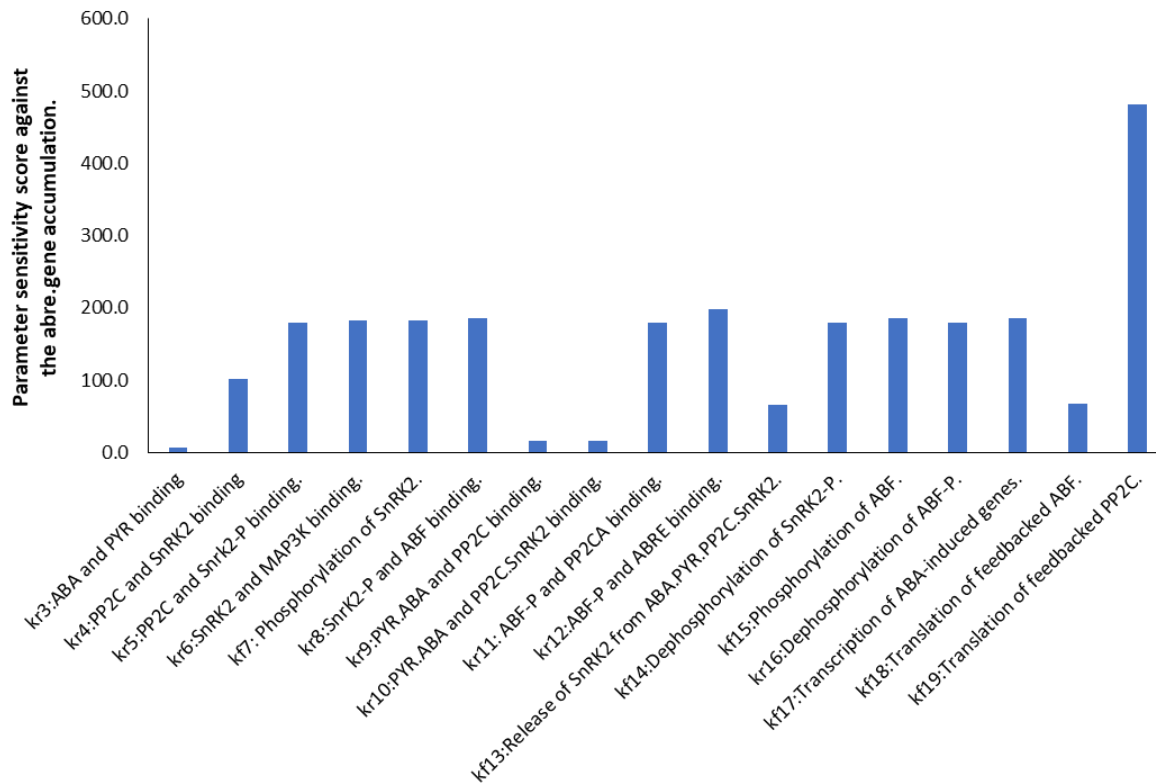

314

315 **Figure 5. Sensitivity analysis identified the parameter of translation rate constant in feed backed PP2Cs is the**  
316 **most sensitive to the kinetics of the variable abre.gene.** A sensitivity analysis was conducted against the variable  
317 `abre.gene` using the calculate sensitivity function in the model analyzer in SimBiology.

318 The analysis found that while most of the selected parameters are equally sensitive,  
319 parameters related to ABA and PYR binding were least sensitive. The parameter related to

320 translation of feedbacked PP2Cs, which was optimized in this study to curve-fit the kinetics of the  
321 variable *abre.gene*, had the highest sensitivity (Fig. 5).

322 To determine how the translation rate constant of PP2Cs affects the ABRE promoter  
323 activity, we changed the PP2C translation rate (*kf19*) and tracked the resulting kinetics of the  
324 variable *abre.gene*. We found that the PP2C translation rate (*kf19*) affects not only the maximum  
325 of variable *abre.gene* but also the peak time when the highest value of the variable *abre.gene* is  
326 achieved (Fig. 6). These dynamics are similar to the changes of the parameter in the PP2C  
327 enzymatic activity (*kf14*; Fig. 4a).

328

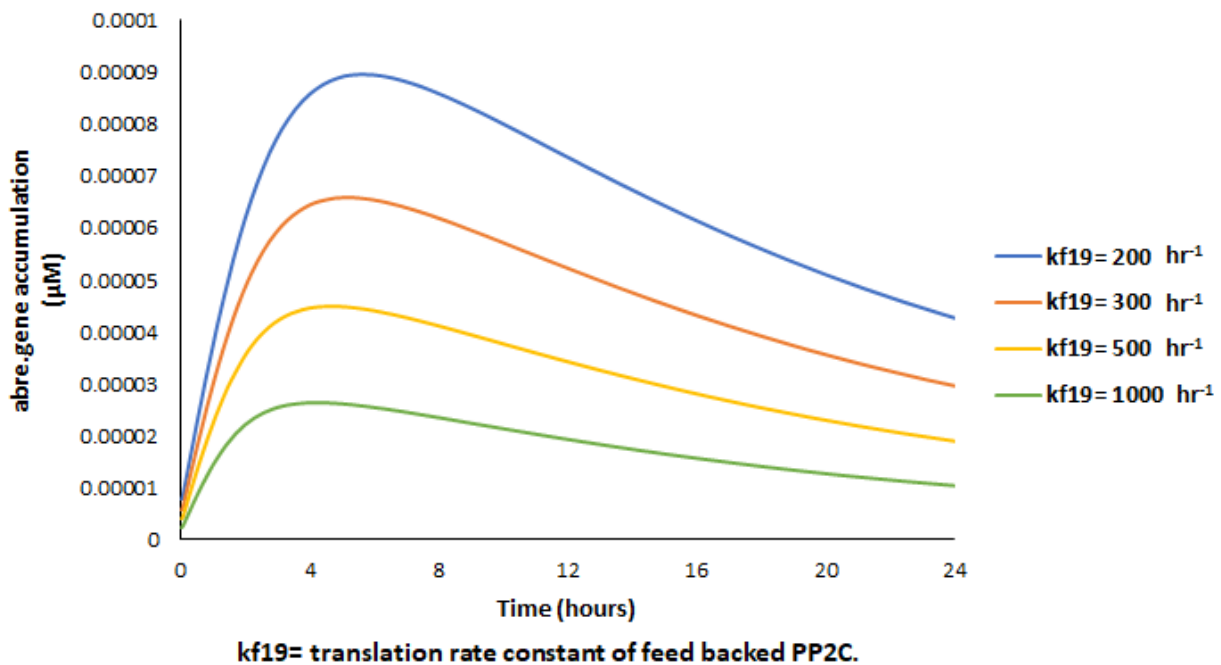



338 conducted only in yeast and animal cells (Schwanhäusser *et al.*, 2011; Weinberg *et al.*, 2016),  
339 indirect measurement has been conducted in plants as well (Fujita *et al.*, 2019).

340 In the indirect measurement, using ribosomal profiling, a ratio of ribosome-protected  
341 mRNA fragments over total mRNA extracted from cells are measured at a given time point. In  
342 theory, a higher ratio of ribosome-protected mRNA over total mRNA indicates higher translation  
343 rate at a given time point. We found in a previously conducted study with a DNA microarray that  
344 translation rates in all PP2Cs involved in the ABA signaling pathway (namely ABI1, ABI2, HAB1,  
345 PP2CA) are downregulated due to dehydration (Table 3) (Kawaguchi *et al.*, 2004). This suggests  
346 that the translation rate in PP2Cs may indeed be downregulated by ABA. Because a microarray  
347 used in the study does not contain a completed set of gene probes, change in translation rate of  
348 ABFs involved in the ABA signaling pathway (namely ABF2, ABF3, and ABF4) is not conclusive.  
349 On the other hand, a study with a deep RNA-sequencing technology, in which all extracted  
350 mRNAs are measured by sequenced frequency, showed that the translation rates of ABFs involved  
351 in the ABA signaling pathway (ABF2, ABF3, and ABF4) are all up-regulated while that of the  
352 PP2Cs (data for ABI2 is not available) are little changed upon exposure of exogenously added  
353 TOR inhibitor (Scarpin *et al.*, 2020) (Table 3). The study concluded that the plant TOR specifically  
354 controls the translation of a set of mRNAs that possesses 5' oligopyrimidine tract motifs (5'TOPs),  
355 which results in alteration of translation in other genes as well.

356 **Table 3. Changes of translation rate in PP2Cs and ABFs identified in the previously published data.**

| mRNA species. | Relative changes in relative translation rate with dehydration, compared to a control condition (Kawaguchi <i>et al.</i> , 2004). | Relative changes in relative translation rate with TOR inhibition, compared to a control condition (Scarpin <i>et al.</i> , 2020). |
|---------------|-----------------------------------------------------------------------------------------------------------------------------------|------------------------------------------------------------------------------------------------------------------------------------|
| ABI1          | 0.92                                                                                                                              | 1                                                                                                                                  |
| ABI2          | 0.95                                                                                                                              | Data not available                                                                                                                 |
| HAB1          | 0.80                                                                                                                              | 0.92                                                                                                                               |
| PP2CA         | 0.98                                                                                                                              | 1.13                                                                                                                               |
| ABF2          | Data not available                                                                                                                | 1.39                                                                                                                               |
| ABF3          | 0.97                                                                                                                              | 1.32                                                                                                                               |

|      |                    |      |
|------|--------------------|------|
| ABF4 | Data not available | 1.15 |
|------|--------------------|------|

357

358           Based on the sensitive analysis on our model and the two previous studies described above,  
359 we hypothesized that ABA downregulates a translation rate of PP2C to increase the ABRE  
360 promoter activity.

361 **Combinational exposure of ABA and TOR inhibitor upregulates activity of the ABRE**  
362 **promoter**

363           We further hypothesized that the combinational exposure of ABA and TOR inhibitor up-  
364 regulates activity of the ABRE promoter. The rationale is as follows. First, upon ABA exposure,  
365 transcription of PP2Cs and ABFs are both upregulated due to the feedback regulation (Wang *et*  
366 *al.*, 2019). Secondly, the translation rate of PP2Cs is down regulated by a yet unknown mechanism  
367 (Kawaguchi *et al.*, 2004), resulting in diminishing the effect of up-regulation of the transcription  
368 of PP2Cs. Thirdly, by exposing a TOR inhibitor, translation rate of ABFs is increased while that  
369 of PP2Cs is not changed (Scarpin *et al.*, 2020). We assumed the increase of the ABF translation  
370 occurs independent from the role of TOR in suppression of PYR-ABA binding activity (Wang *et*  
371 *al.*, 2018). As a result, by exposing ABA and a TOR inhibitor, the activity of the ABRE promoter  
372 increases, compared to when only ABA is exposed to plants.

373           To examine the hypothesis, we analyzed the ABRE promoter activity in the *RD29A::LUC*  
374 transgenic plants. As a control, we analyzed the *CAMV35S::LUC* transgenic plants. We exposed  
375 the plants to ABA only and ABA and rapamycin, the TOR inhibitor (Xiong & Sheen, 2012). When  
376 the plants were exposed to ABA alone, luciferase intensity was increased as expected (Fig. 7).

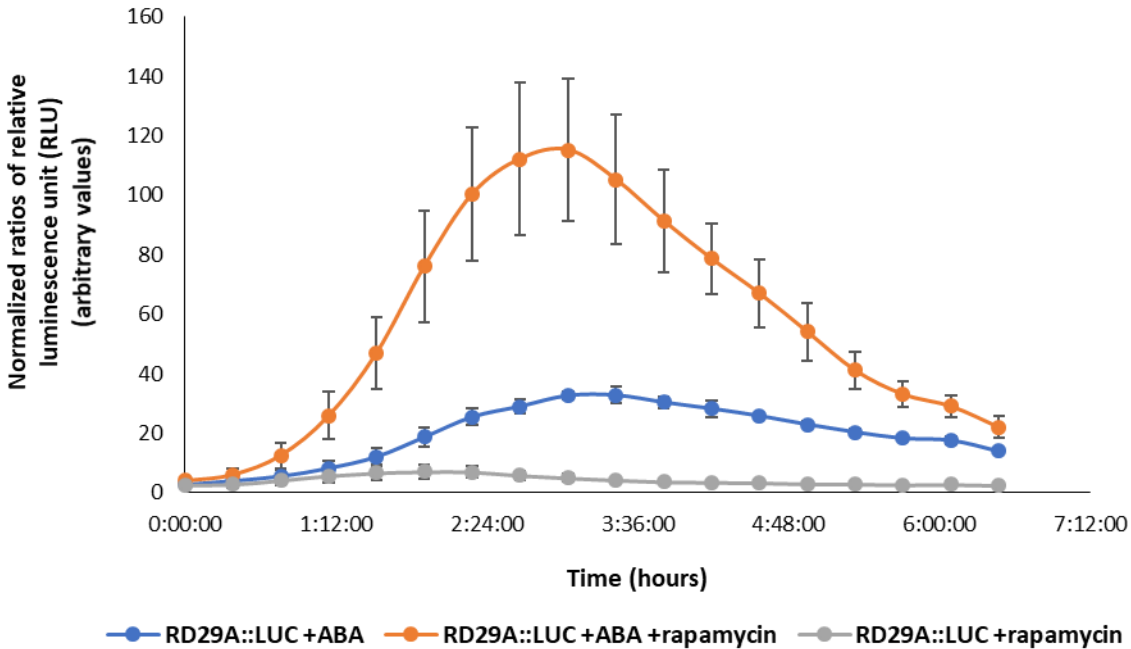

377

378 **Figure 7. Combinational exposure of ABA and rapamycin increases the ABRE promoter activity.** Normalized  
379 luminescence in the *RD29A::LUC* transgenic plants are shown. The plants were exposed to 200  $\mu$ M ABA alone or  
380 200  $\mu$ M ABA + 10  $\mu$ M rapamycin or 10  $\mu$ M rapamycin only. Luminescence values were normalized against control  
381 (DMSO only). Data shown is means of three independent replicates with error bars derived from standard error from  
382 the mean.

383 When the plants were exposed to both rapamycin and ABA, the luciferase intensity was  
384 about 4-fold higher than that when plants were exposed to ABA alone at the maximum. When the  
385 *RD29A::LUC* transgenic plants were exposed to rapamycin alone, luciferase activity was little  
386 altered (Fig. 7). When the *CAMV35S::LUC* transgenic plants were examined with the identical  
387 conditions, no significant difference was observed among the different exposures (Fig. S2). This  
388 result supported our hypothesis that combinational exposure of TOR inhibitor and ABA up-  
389 regulates activity of the ABRE promoter.

390

## 391 Discussion

392 Here we presented a model of the ABA signaling pathway describing the activation of  
393 ABF and resulting activation of the ABRE promoter (Fig. 1). The model was built with fixed  
394 parameter values of protein-protein interactions and enzymatic kinetics that were obtained by *in*

395 *in vitro* experiments from the literature. The model suggests that the feedback regulation of PP2C  
396 and ABF allows the transient upregulation of the ABRE promoter. Without the feedback, the  
397 model predicts that ABRE expression activity would be logarithmic and not show the transient  
398 increase (Fig. 2e). Based on the model prediction, we hypothesized that inhibition of the PP2C  
399 phosphatase activity on SnRK2 would increase expression of the ABA induced gene and delay its  
400 peak time. The hypothesis was supported by biological experimentation using transgenic  
401 Arabidopsis plants (Fig. 4b). The model also predicted that the translation rate for PP2C in the  
402 feedback regulation is the most sensitive parameter for activation of the ABRE promoter while  
403 parameters related to ABA and PYR binding were least sensitive (Fig. 5). The reason parameters  
404 related to ABA and PYR binding were least sensitive is evident because we assume extremely  
405 high concentration of ABA (100  $\mu$ M) is exposed to plants, while a production of endogenous ABA  
406 during abiotic stress would be in a nM range (Dubas *et al.*, 2013). We found out that a high value  
407 of the translation rate not only reduces the ABRE promoter activity but also expedites the time  
408 point when the promoter activity reaches the maximum (Fig. 6). This suggested that the translation  
409 rate of PP2C would be one of the most important factors that determine the kinetics of the ABRE  
410 promoter activity. In the past, accumulation of mRNA and post-translational modification of  
411 proteins are thought to define activity of the ABRE promoter (Nordin *et al.*, 1993; Joo *et al.*, 2021).  
412 However, our model and biological experimental data suggest that changes in translation rates  
413 would also largely determine the activity of the ABRE promoter (Fig. 7). Our literature search  
414 found out that the translation rate of PP2Cs is downregulated during dehydration (Table 3). This  
415 suggests that activity of the ABRE promoter would be regulated by not only upregulation of the  
416 gene expression but also downregulation of the protein translation on PP2Cs.

417 We are aware that not only translation rate but also degradation rate of proteins, which are  
418 not investigated in this study, are important in the ABA signaling pathway (Wu *et al.*, 2016; Ali *et*  
419 *al.*, 2019). Hence, changes of protein degradation rate by ABA must be quantitatively analyzed to  
420 conclude the role of translation rate in the ABA signaling pathway. We are also aware that ABFs  
421 are not the only transcription factors that bind to the ABRE promoter (Song *et al.*, 2016). Hence,  
422 the activity of the ABRE promoter does not depend only on ABF activation in actual plants,  
423 whereas in the model we consider the activity of ABF only. To fully understand kinetics of the  
424 ABRE promoter activity in actual plants, further expansion of the model to include other  
425 transcription factors is required. Furthermore, quantitative predictions in the current model

426 somewhat disagrees with real plant data. For instance, when an ABA-concentration dependent  
427 response of the ABRE promoter was determined, the response range was narrower in the model  
428 than in actual plants (Fig. 3). Optimization of parameter values fixed in this study or the expansion  
429 to include other factors driving the ABRE promoter may be required to improve model  
430 performance.

431 Nevertheless, our model successfully builds off existing work to represent the relationship  
432 between the ABA signaling pathway and ABRE gene expression. As demonstrated here, the  
433 model is useful to generate novel hypotheses. The model suggests new avenues of experimental  
434 inquiry. In particular, our analysis proposes that investigating alteration of translation rates in  
435 proteins, such as PP2Cs, is the next frontier in the research field of ABA signaling pathway and  
436 downstream promoter activity.

437

#### 438 **Acknowledgements**

439 This study is, in a part, supported by Economic Development Assistantships from Louisiana State.

#### 440 **Author Contribution**

441 Conceptualization and methodology, N.K. Validation, R.N. and R.D. Experiments, R.N. Formal  
442 analysis, R.N. and N.K. Writing—original draft preparation, R.N. and N.K. Writing—review and  
443 editing, R.N. R.D. and N.K. Funding acquisition, N.K. All authors have read and agreed to the  
444 published version of the manuscript.

#### 445 **Data Availability**

446 .sbproj file (MATLAB SimBiology Project File) that includes a model diagram, ODE equations,  
447 initial values, parameters, simulations for Figures 2, 3, 4, 5, 6, and Table 2 are available as  
448 supplement files.

449

450 **References**

- 451 **Albert R, Acharya BR, Jeon BW, Zañudo JGT, Zhu M, Osman K, Assmann SM. 2017.** A new discrete  
452 dynamic model of ABA-induced stomatal closure predicts key feedback loops. *PLOS Biology* **15**:  
453 e2003451.
- 454 **Aldridge BB, Burke JM, Lauffenburger DA, Sorger PK. 2006.** Physicochemical modelling of cell signalling  
455 pathways. *Nature Cell Biology* **8**.
- 456 **Ali A, Kim JK, Jan M, Khan HA, Khan IU, Shen M, Park J, Lim CJ, Hussain S, Baek D, et al. 2019.**  
457 Rheostatic Control of ABA Signaling through HOS15-Mediated OST1 Degradation. *Molecular*  
458 *Plant* **12**: 1447–1462.
- 459 **Antoni R, Gonzalez-Guzman M, Rodriguez L, Rodrigues A, Pizzio GA, Rodriguez PL. 2012.** Selective  
460 Inhibition of Clade A Phosphatases Type 2C by PYR/PYL/RCAR Abscisic Acid Receptors. *Plant*  
461 *Physiology* **158**: 970–980.
- 462 **Bar-Even A, Noor E, Savir Y, Liebermeister W, Davidi D, Tawfik DS, Milo R. 2011.** The Moderately  
463 Efficient Enzyme: Evolutionary and Physicochemical Trends Shaping Enzyme Parameters.  
464 *Biochemistry* **50**: 4402–4410.
- 465 **Basu S, Ramegowda V, Kumar A, Pereira A. 2016.** Plant adaptation to drought stress. *F1000Research* **5**:  
466 F1000 Faculty Rev-1554.
- 467 **Belin C, de Franco P-O, Bourbousse C, Chaignepain S, Schmitter J-M, Vavasseur A, Giraudat J, Barbier-**  
468 **Brygoo H, Thomine S. 2006.** Identification of features regulating OST1 kinase activity and OST1  
469 function in guard cells. *Plant Physiology* **141**: 1316–1327.
- 470 **Choi H, Hong J, Ha J, Kang J, Kim SY. 2000.** ABFs, a Family of ABA-responsive Element Binding Factors \*.  
471 *Journal of Biological Chemistry* **275**: 1723–1730.

- 472 **Dubas E, Janowiak F, Krzewska M, Hura T, Źur I. 2013.** Endogenous ABA concentration and cytoplasmic  
473 membrane fluidity in microspores of oilseed rape (*Brassica napus* L.) genotypes differing in  
474 responsiveness to androgenesis induction. *Plant Cell Reports* **32**: 1465–1475.
- 475 **Dupeux F, Santiago J, Betz K, Twycross J, Park S-Y, Rodriguez L, Gonzalez-Guzman M, Jensen MR,**  
476 **Krasnogor N, Blackledge M, et al. 2011.** A thermodynamic switch modulates abscisic acid  
477 receptor sensitivity. *The EMBO Journal* **30**: 4171–4184.
- 478 **Forzani C, Duarte GT, Van Leene J, Clément G, Huguet S, Paysant-Le-Roux C, Mercier R, De Jaeger G,**  
479 **Leprince A-S, Meyer C. 2019.** Mutations of the AtYAK1 Kinase Suppress TOR Deficiency in  
480 *Arabidopsis*. *Cell Reports* **27**: 3696-3708.e5.
- 481 **Fujii H, Chinnusamy V, Rodrigues A, Rubio S, Antoni R, Park S-Y, Cutler SR, Sheen J, Rodriguez PL, Zhu**  
482 **J-K. 2009.** In vitro Reconstitution of an ABA Signaling Pathway. *Nature* **462**: 660–664.
- 483 **Fujii H, Zhu J-K. 2009.** *Arabidopsis* mutant deficient in 3 abscisic acid-activated protein kinases reveals  
484 critical roles in growth, reproduction, and stress. *Proceedings of the National Academy of*  
485 *Sciences* **106**: 8380–8385.
- 486 **Fujita T, Kurihara Y, Iwasaki S. 2019.** The Plant Translatome Surveyed by Ribosome Profiling. *Plant & Cell*  
487 *Physiology* **60**: 1917–1926.
- 488 **Fujita Y, Nakashima K, Yoshida T, Katagiri T, Kidokoro S, Kanamori N, Umezawa T, Fujita M, Maruyama**  
489 **K, Ishiyama K, et al. 2009.** Three SnRK2 Protein Kinases are the Main Positive Regulators of  
490 Abscisic Acid Signaling in Response to Water Stress in *Arabidopsis*. *Plant and Cell Physiology* **50**:  
491 2123–2132.
- 492 **Gampala SSL, Hagenbeek D, Rock CD. 2001.** Functional Interactions of Lanthanum and Phospholipase D  
493 with the Abscisic Acid Signaling Effectors VP1 and ABI1-1 in Rice Protoplasts. *Journal of*  
494 *Biological Chemistry* **276**: 9855–9860.

- 495 **Geertz M, Shore D, Maerkl SJ. 2012.** Massively parallel measurements of molecular interaction kinetics  
496 on a microfluidic platform. *Proceedings of the National Academy of Sciences* **109**: 16540–16545.
- 497 **Geiger D, Scherzer S, Mumm P, Stange A, Marten I, Bauer H, Ache P, Matschi S, Liese A, Al-Rasheid**  
498 **KAS, et al. 2009.** Activity of guard cell anion channel SLAC1 is controlled by drought-stress  
499 signaling kinase-phosphatase pair. *Proceedings of the National Academy of Sciences of the*  
500 *United States of America* **106**: 21425–21430.
- 501 **Ghose R. 2019.** Nature of the Pre-Chemistry Ensemble in Mitogen-Activated Protein Kinases. *Journal of*  
502 *Molecular Biology* **431**: 145–157.
- 503 **Gonzalez-Guzman M, Pizzio GA, Antoni R, Vera-Sirera F, Merilo E, Bassel GW, Fernández MA,**  
504 **Holdsworth MJ, Perez-Amador MA, Kollist H, et al. 2012.** Arabidopsis PYR/PYL/RCAR Receptors  
505 Play a Major Role in Quantitative Regulation of Stomatal Aperture and Transcriptional Response  
506 to Abscisic Acid. *The Plant Cell* **24**: 2483–2496.
- 507 **Gosti F, Beaudoin N, Serizet C, Webb AAR, Vartanian N, Giraudat J. 1999.** ABI1 Protein Phosphatase 2C  
508 Is a Negative Regulator of Abscisic Acid Signaling. *The Plant Cell* **11**: 1897–1909.
- 509 **Hausser J, Mayo A, Keren L, Alon U. 2019.** Central dogma rates and the trade-off between precision and  
510 economy in gene expression. *Nature Communications* **10**: 68.
- 511 **Hoops S, Hontecillas R, Abedi V, Leber A, Philipson C, Carbo A, Bassaganya-Riera J. 2016.** Chapter 5 -  
512 Ordinary Differential Equations (ODEs) Based Modeling. In: Bassaganya-Riera J, ed.  
513 Computational Immunology. Academic Press, 63–78.
- 514 **Ikegami K, Okamoto M, Seo M, Koshiba T. 2008.** Activation of abscisic acid biosynthesis in the leaves of  
515 Arabidopsis thaliana in response to water deficit. *Journal of Plant Research* **122**: 235.
- 516 **Janes KA, Yaffe MB. 2006.** Data-driven modelling of signal-transduction networks. *Nature Reviews*  
517 *Molecular Cell Biology* **7**.



- 518 **Janicki M, Marczak M, Cieřła A, Ludwików A. 2020.** Identification of Novel Inhibitors of a Plant Group A  
519 Protein Phosphatase Type 2C Using a Combined In Silico and Biochemical Approach. *Frontiers in*  
520 *Plant Science* **11**: 1416.
- 521 **Joo H, Baek W, Lim CW, Lee SC. 2021.** Post-translational Modifications of bZIP Transcription Factors in  
522 Abscisic Acid Signaling and Drought Responses. *Current Genomics* **22**: 4–15.
- 523 **Kawaguchi R, Girke T, Bray EA, Bailey-Serres J. 2004.** Differential mRNA translation contributes to gene  
524 regulation under non-stress and dehydration stress conditions in *Arabidopsis thaliana*. *The Plant*  
525 *Journal: For Cell and Molecular Biology* **38**: 823–839.
- 526 **Kim D, Ntui VO, Xiong L. 2016.** *Arabidopsis* YAK1 regulates abscisic acid response and drought  
527 resistance. *FEBS letters* **590**: 2201–2209.
- 528 **Kumar S, Sachdeva S, Bhat KV, Vats S. 2018.** Plant Responses to Drought Stress: Physiological,  
529 Biochemical and Molecular Basis. In: Vats S, ed. *Biotic and Abiotic Stress Tolerance in Plants*.  
530 Singapore: Springer, 1–25.
- 531 **Lee SY, Boon NJ, Webb AAR, Tanaka RJ. 2016.** Synergistic Activation of RD29A Via Integration of Salinity  
532 Stress and Abscisic Acid in *Arabidopsis thaliana*. *Plant and Cell Physiology* **57**: 2147–2160.
- 533 **Lee SC, Lan W, Buchanan BB, Luan S. 2009.** A protein kinase-phosphatase pair interacts with an ion  
534 channel to regulate ABA signaling in plant guard cells. *Proceedings of the National Academy of*  
535 *Sciences of the United States of America* **106**: 21419–21424.
- 536 **Li S, Assmann SM, Albert R. 2006.** Predicting Essential Components of Signal Transduction Networks: A  
537 Dynamic Model of Guard Cell Abscisic Acid Signaling. *PLOS Biology* **4**: e312.
- 538 **Lynch T, Erickson BJ, Finkelstein RR. 2012.** Direct interactions of ABA-insensitive(ABI)-clade protein  
539 phosphatase(PP)2Cs with calcium-dependent protein kinases and ABA response element-  
540 binding bZIPs may contribute to turning off ABA response. *Plant Molecular Biology* **80**: 647–658.

- 541 **Ma Y, Szostkiewicz I, Korte A, Moes D, Yang Y, Christmann A, Grill E. 2009.** Regulators of PP2C  
542 Phosphatase Activity Function as Abscisic Acid Sensors. *Science* **324**: 1064–1068.
- 543 **Maheshwari P, Assmann SM, Albert R. 2020.** A Guard Cell Abscisic Acid (ABA) Network Model That  
544 Captures the Stomatal Resting State. *Frontiers in Physiology* **0**.
- 545 **Maheshwari P, Du H, Sheen J, Assmann SM, Albert R. 2019.** Model-driven discovery of calcium-related  
546 protein-phosphatase inhibition in plant guard cell signaling. *PLOS Computational Biology* **15**:  
547 e1007429.
- 548 **Melcher K, Ng L-M, Zhou XE, Soon F-F, Xu Y, Suino-Powell KM, Park S-Y, Weiner JJ, Fujii H, Chinnusamy**  
549 **V, et al. 2009.** A Gate-Latch-Lock Mechanism for Hormone Signaling by Abscisic Acid Receptors.  
550 *Nature* **462**: 602–608.
- 551 **Merlot S, Gosti F, Guerrier D, Vavasseur A, Giraudat J. 2001.** The ABI1 and ABI2 protein phosphatases  
552 2C act in a negative feedback regulatory loop of the abscisic acid signalling pathway. *The Plant*  
553 *Journal: For Cell and Molecular Biology* **25**: 295–303.
- 554 **Milo R, Phillips R. 2015.** *Cell Biology by the numbers*. New York: Garland Science.
- 555 **Murashige T, Skoog F. 1962.** A Revised Medium for Rapid Growth and Bio Assays with Tobacco Tissue  
556 Cultures. *Physiologia Plantarum* **15**: 473–497.
- 557 **Nishimura N, Hitomi K, Arvai AS, Rambo RP, Hitomi C, Cutler SR, Schroeder JI, Getzoff ED. 2009.**  
558 Structural Mechanism of Abscisic Acid Binding and Signaling by Dimeric PYR1. *Science (New York,*  
559 *N.Y.)* **326**: 1373–1379.
- 560 **Nishimura N, Sarkeshik A, Nito K, Park S-Y, Wang A, Carvalho PC, Lee S, Caddell DF, Cutler SR, Chory J,**  
561 **et al. 2010.** PYR/PYL/RCAR family members are major in-vivo ABI1 protein phosphatase 2C-  
562 interacting proteins in Arabidopsis. *The Plant Journal: For Cell and Molecular Biology* **61**: 290–  
563 299.

564 **Nishimura N, Yoshida T, Kitahata N, Asami T, Shinozaki K, Hirayama T. 2007.** ABA-Hypersensitive  
565 Germination1 encodes a protein phosphatase 2C, an essential component of abscisic acid  
566 signaling in Arabidopsis seed. *The Plant Journal: For Cell and Molecular Biology* **50**: 935–949.

567 **Nordin K, Vahala T, Palva ET. 1993.** Differential expression of two related, low-temperature-induced  
568 genes in Arabidopsis thaliana (L.) Heynh. *Plant Molecular Biology* **21**: 641–653.

569 **Norval LW, Krämer SD, Gao M, Herz T, Li J, Rath C, Wöhrle J, Günther S, Roth G. 2019.** KOFFI and  
570 Anabel 2.0—a new binding kinetics database and its integration in an open-source binding  
571 analysis software. *Database* **2019**.

572 **Pan C, Tang J, Xu Y, Xiao P, Liu H, Wang H, Wang W, Meng F, Yu X, Sun J. 2015.** The catalytic role of the  
573 M2 metal ion in PP2Ca. *Scientific Reports* **5**.

574 **Park S-Y, Fung P, Nishimura N, Jensen DR, Fujii H, Zhao Y, Lumba S, Santiago J, Rodrigues A, Chow TF,**  
575 **et al. 2009.** Abscisic acid inhibits PP2Cs via the PYR/PYL family of ABA-binding START proteins.  
576 *Science (New York, N.Y.)* **324**: 1068–1071.

577 **Philips RM& R.** Cell Biology by the Numbers.

578 **Poolman MG, Assmus HE, Fell DA. 2004.** Applications of metabolic modelling to plant metabolism.  
579 *Journal of Experimental Botany* **55**: 1177–1186.

580 **Rodriguez PL, Leube MP, Grill E. 1998.** Molecular cloning in Arabidopsis thaliana of a new protein  
581 phosphatase 2C (PP2C) with homology to ABI1 and ABI2. *Plant Molecular Biology* **38**: 879–883.

582 **Rosin FM, Watanabe N, Cacas J-L, Kato N, Arroyo JM, Fang Y, May B, Vaughn M, Simorowski J, Ramu**  
583 **U, et al. 2008.** Genome-wide transposon tagging reveals location-dependent effects on  
584 transcription and chromatin organization in Arabidopsis. *The Plant Journal: For Cell and*  
585 *Molecular Biology* **55**: 514–525.

- 586 **Rubio S, Rodrigues A, Saez A, Dizon MB, Galle A, Kim T-H, Santiago J, Flexas J, Schroeder JI, Rodriguez**  
587 **PL. 2009.** Triple Loss of Function of Protein Phosphatases Type 2C Leads to Partial Constitutive  
588 Response to Endogenous Abscisic Acid. *Plant Physiology* **150**: 1345–1355.
- 589 **Saez A, Apostolova N, Gonzalez-Guzman M, Gonzalez-Garcia MP, Nicolas C, Lorenzo O, Rodriguez PL.**  
590 **2004.** Gain-of-function and loss-of-function phenotypes of the protein phosphatase 2C HAB1  
591 reveal its role as a negative regulator of abscisic acid signalling. *The Plant Journal: For Cell and*  
592 *Molecular Biology* **37**: 354–369.
- 593 **Santiago J, Rodrigues A, Saez A, Rubio S, Antoni R, Dupeux F, Park S-Y, Márquez JA, Cutler SR,**  
594 **Rodriguez PL. 2009.** Modulation of drought resistance by the abscisic acid receptor PYL5  
595 through inhibition of clade A PP2Cs. *The Plant Journal* **60**: 575–588.
- 596 **Sauter A, Davies WJ, Hartung W. 2001.** The long-distance abscisic acid signal in the droughted plant: the  
597 fate of the hormone on its way from root to shoot. *Journal of Experimental Botany* **52**: 1991–  
598 1997.
- 599 **Scarpin MR, Leiboff S, Brunkard JO. 2020.** Parallel global profiling of plant TOR dynamics reveals a  
600 conserved role for LARP1 in translation (JL Manley, N Sonenberg, and O Meyuhas, Eds.). *eLife* **9**:  
601 e58795.
- 602 **Schroeder JI, Hedrich R, Fernandez JM. 1984.** Potassium-selective single channels in guard cell  
603 protoplasts of *Vicia faba*. *Nature* **312**: 361–362.
- 604 **Schwanhäusser B, Busse D, Li N, Dittmar G, Schuchhardt J, Wolf J, Chen W, Selbach M. 2011.** Global  
605 quantification of mammalian gene expression control. *Nature* **473**: 337–342.
- 606 **Singh A, Jha SK, Bagri J, Pandey GK. 2015.** ABA Inducible Rice Protein Phosphatase 2C Confers ABA  
607 Insensitivity and Abiotic Stress Tolerance in Arabidopsis. *PLOS ONE* **10**: e0125168.

- 608 **Song L, Huang SC, Wise A, Castanon R, Nery JR, Chen H, Watanabe M, Thomas J, Bar-Joseph Z, Ecker**  
609 **JR. 2016.** A transcription factor hierarchy defines an environmental stress response network.  
610 *Science* **354**.
- 611 **Soon F-F, Ng L-M, Zhou XE, West GM, Kovach A, Tan MHE, Suino-Powell KM, He Y, Xu Y, Chalmers MJ,**  
612 **et al. 2012.** Molecular Mimicry Regulates ABA Signaling by SnRK2 Kinases and PP2C  
613 Phosphatases. *Science (New York, N.Y.)* **335**: 85–88.
- 614 **Steuer B, Stuhlfauth T, Fock HP. 1988.** The efficiency of water use in water stressed plants is increased  
615 due to ABA induced stomatal closure. *Photosynthesis Research* **18**: 327–336.
- 616 **Takahashi F, Kuromori T, Urano K, Yamaguchi-Shinozaki K, Shinozaki K. 2020a.** Drought Stress  
617 Responses and Resistance in Plants: From Cellular Responses to Long-Distance Intercellular  
618 Communication. *Frontiers in Plant Science* **11**: 1407.
- 619 **Takahashi Y, Zhang J, Hsu P-K, Ceciliato PHO, Zhang L, Dubeaux G, Munemasa S, Ge C, Zhao Y, Hauser**  
620 **F, et al. 2020b.** MAP3Kinase-dependent SnRK2-kinase activation is required for abscisic acid  
621 signal transduction and rapid osmotic stress response. *Nature Communications* **11**: 12.
- 622 **Thakar J, Pilione M, Kirimanjeswara G, Harvill ET, Albert R. 2007.** Modeling Systems-Level Regulation of  
623 Host Immune Responses. *PLOS Computational Biology* **3**: e109.
- 624 **Thalmann M, Pazmino D, Seung D, Horrer D, Nigro A, Meier T, Kölling K, Pfeifhofer HW, Zeeman SC,**  
625 **Santelia D. 2016.** Regulation of Leaf Starch Degradation by Abscisic Acid Is Important for  
626 Osmotic Stress Tolerance in Plants[OPEN]. *The Plant Cell* **28**: 1860–1878.
- 627 **Umezawa T, Sugiyama N, Mizoguchi M, Hayashi S, Myouga F, Yamaguchi-Shinozaki K, Ishihama Y,**  
628 **Hirayama T, Shinozaki K. 2009.** Type 2C protein phosphatases directly regulate abscisic acid-  
629 activated protein kinases in Arabidopsis. *Proceedings of the National Academy of Sciences* **106**:  
630 17588–17593.

- 631 **Uno Y, Furihata T, Abe H, Yoshida R, Shinozaki K, Yamaguchi-Shinozaki K. 2000.** Arabidopsis basic  
632 leucine zipper transcription factors involved in an abscisic acid-dependent signal transduction  
633 pathway under drought and high-salinity conditions. *Proceedings of the National Academy of*  
634 *Sciences* **97**: 11632–11637.
- 635 **Wang X, Guo C, Peng J, Li C, Wan F, Zhang S, Zhou Y, Yan Y, Qi L, Sun K, et al. 2019.** ABRE-BINDING  
636 FACTORS play a role in the feedback regulation of ABA signaling by mediating rapid ABA  
637 induction of ABA co-receptor genes. *New Phytologist* **221**: 341–355.
- 638 **Wang P, Zhao Y, Li Z, Hsu C-C, Liu X, Fu L, Hou Y-J, Du Y, Xie S, Zhang C, et al. 2018.** Reciprocal  
639 Regulation of the TOR Kinase and ABA Receptor Balances Plant Growth and Stress Response.  
640 *Molecular Cell* **69**: 100-112.e6.
- 641 **Weinberg DE, Shah P, Eichhorn SW, Hussmann JA, Plotkin JB, Bartel DP. 2016.** Improved Ribosome-  
642 Footprint and mRNA Measurements Provide Insights into Dynamics and Regulation of Yeast  
643 Translation. *Cell Reports* **14**: 1787–1799.
- 644 **Wu Q, Zhang X, Peirats-Llobet M, Belda-Palazon B, Wang X, Cui S, Yu X, Rodriguez PL, An C. 2016.**  
645 Ubiquitin Ligases RGLG1 and RGLG5 Regulate Abscisic Acid Signaling by Controlling the Turnover  
646 of Phosphatase PP2CA. *The Plant Cell* **28**: 2178–2196.
- 647 **Xie T, Ren R, Zhang Y, Pang Y, Yan C, Gong X, He Y, Li W, Miao D, Hao Q, et al. 2012.** Molecular  
648 Mechanism for Inhibition of a Critical Component in the Arabidopsis thaliana Abscisic Acid Signal  
649 Transduction Pathways, SnRK2.6, by Protein Phosphatase ABI1. *The Journal of Biological*  
650 *Chemistry* **287**: 794–802.
- 651 **Xiong Y, Sheen J. 2012.** Rapamycin and Glucose-Target of Rapamycin (TOR) Protein Signaling in Plants\*.  
652 *Journal of Biological Chemistry* **287**: 2836–2842.

- 653 **Yin P, Fan H, Hao Q, Yuan X, Wu D, Pang Y, Yan C, Li W, Wang J, Yan N. 2009.** Structural insights into the  
654 mechanism of abscisic acid signaling by PYL proteins. *Nature Structural & Molecular Biology* **16**:  
655 1230–1236.
- 656 **Yoshida T, Fujita Y, Maruyama K, Mogami J, Todaka D, Shinozaki K, Yamaguchi-Shinozaki K. 2015.** Four  
657 Arabidopsis AREB/ABF transcription factors function predominantly in gene expression  
658 downstream of SnRK2 kinases in abscisic acid signalling in response to osmotic stress. *Plant, Cell*  
659 *& Environment* **38**: 35–49.
- 660 **Zeevaart JAD, Creelman RA. 1988.** Metabolism and Physiology of Abscisic Acid. *Annual Review of Plant*  
661 *Physiology and Plant Molecular Biology* **39**: 439–473.
- 662 **Zhan X, Wang B, Li H, Liu R, Kalia RK, Zhu J-K, Chinnusamy V. 2012.** Arabidopsis proline-rich protein  
663 important for development and abiotic stress tolerance is involved in microRNA biogenesis.  
664 *Proceedings of the National Academy of Sciences* **109**: 18198–18203.
- 665 **Zhao J, Zhao L, Zhang M, Zafar SA, Fang J, Li M, Zhang W, Li X. 2017.** Arabidopsis E3 Ubiquitin Ligases  
666 PUB22 and PUB23 Negatively Regulate Drought Tolerance by Targeting ABA Receptor PYL9 for  
667 Degradation. *International Journal of Molecular Sciences* **18**: 1841.
- 668
